1 **The Alzheimer's disease-associated protective *Plcγ2*-P522R variant promotes beneficial**  
2 **microglial functions**

3 Mari Takalo<sup>1</sup>, Rebekka Wittrahm<sup>1</sup>, Benedikt Wefers<sup>2,3</sup>, Samira Parhizkar<sup>4</sup>, Kimmo Jokivarsi<sup>5</sup>, Teemu  
4 Kuulasmaa<sup>1</sup>, Petra Mäkinen<sup>1</sup>, Henna Martiskainen<sup>1</sup>, Wolfgang Wurst<sup>2,3,8</sup>, Xianyuan Xiang<sup>4</sup>, Mikael  
5 Martinen<sup>1,6</sup>, Pekka Poutiainen<sup>7</sup>, Annakaisa Haapasalo<sup>5</sup>, \*Mikko Hiltunen<sup>†1</sup>, \*Christian Haass<sup>†2,4,8</sup>

6 1. Institute of Biomedicine, University of Eastern Finland, Kuopio, Finland

7 2. Deutsches Zentrum für Neurodegenerative Erkrankungen (DZNE), München, Munich, Germany

8 3. Institute of Developmental Genetics, Helmholtz Zentrum München, Munich, Germany

9 4. Metabolic Biochemistry, Biomedical Center (BMC), Faculty of Medicine, Ludwig-Maximilians-  
10 Universität München, Munich, Germany

11 5. A.I. Virtanen Institute for Molecular Sciences, University of Eastern Finland, Kuopio, Finland

12 6. Structural and Computational Biology Unit, European Molecular Biology Laboratory, Heidelberg,  
13 Germany.

14 7. Center of Diagnostic Imaging, Department of Cyclotron and Radiopharmacy, Kuopio University  
15 Hospital, Kuopio, Finland

16 8. Munich Cluster for Systems Neurology (SyNergy), Munich, Germany

17

18 † These authors contributed equally

19 \* Corresponding authors

20 E-mail: Christian.Haass@mail03.med.uni-muenchen.de

21 Telephone: (+49-89) 4400-46549

22 E-mail: mikko.hiltunen@uef.fi

23 Telephone: +358403552014

24 **Abstract**

25 **Background:** Microglia-specific genetic variants are enriched in several neurodegenerative diseases,  
26 including Alzheimer's disease (AD), implicating a central role for alterations of the innate immune  
27 system in the disease etiology. A rare coding variant in the *PLCG2* gene (rs72824905, p.P522R)  
28 selectively expressed in microglia and macrophages was recently identified and shown to reduce the  
29 risk for AD.

30 **Methods:** To assess the role of this variant in the context of immune cell functions, we generated a  
31 *Plcγ2*-P522R knock-in (KI) mouse model using CRISPR/Cas9 gene editing.

32 **Results:** Functional analyses of macrophages derived from homozygous KI mice and wild type (WT)  
33 littermates revealed that the P522R variant potentiates the primary function of *Plcγ2* as a Pip2-  
34 metabolizing enzyme. This was associated with improved survival, enhanced phagocytic activity, and  
35 increased acute inflammatory response of the KI cells. Enhanced phagocytosis was also observed in  
36 mouse BV2 microglia-like cells overexpressing human *PLCγ2*-P522R, but not in *PLCγ2*-WT  
37 expressing cells. Furthermore, the brain mRNA signature together with microglia-specific PET  
38 imaging indicated microglia activation in *Plcγ2*-P522R KI mice.

39 **Conclusion:** Thus, we have delineated cellular mechanisms of the protective *Plcγ2*-P522R variant,  
40 which provide further support for the emerging idea that activated microglia exert protective functions  
41 in AD.

42 **Keywords:** Alzheimer's disease, macrophage, microglia, knock-in mouse model, *PLCG2*

43

44

45

46

47

## 48 Findings

49 Recent genome-wide association studies have identified several Alzheimer's disease (AD)-associated  
50 risk loci in genes selectively or preferentially expressed in microglia (e.g. *TREM2*, *ABI3*, *PLCG2*) [1].  
51 A rare coding variant in microglia-/macrophage-specific *PLCG2* gene (rs72824905, p.P522R,  
52 OR<0.6) encoding phospholipase C gamma 2 (Plc $\gamma$ 2) enzyme was recently identified, showing a  
53 reduced risk of AD [1]. Interestingly, the same *PLCG2* variant associated with a lower risk of other  
54 neurodegenerative diseases and increased the likelihood for longevity [2]. Plc $\gamma$ 2 catalyzes the  
55 conversion of phosphatidylinositol 4,5-bisphosphate (Pip2) to inositol 1,4,5-trisphosphate (Ip3) and  
56 diacylglycerol (Dag) upon activation of various transmembrane immune receptors, including  
57 Triggering receptor expressed on myeloid cells 2 (Trem2) (**Fig 1A**) [3, 4]. Ip3 and Dag regulate  
58 pathways related to e.g. survival, phagocytosis, and cytokine production via controlling intracellular  
59 calcium mobilization as well as protein kinase C, nuclear factor kappa-light-chain-enhancer of  
60 activated B cells (Nfkb), mitogen-activated protein kinase (Mapk/Erk), and protein kinase B (Akt)  
61 signaling [5-7]. The P522R variation locates in the regulatory domain of Plc $\gamma$ 2, but whether this  
62 variant affects the above-mentioned functions of microglia and other myeloid lineage cells, is not  
63 known.

64 Here, we have generated a Plc $\gamma$ 2-P522R knock-in (KI) mouse model using the CRISPR/Cas9 gene  
65 editing technology (**Fig 1B**) [8, 9] to investigate the effects of this protective variant in isolated  
66 macrophages and microglia and *in vivo* within the brain. Founder mice with successful incorporation  
67 of the variant and confirmed to be negative for off-target effects were used for generation of a viable  
68 and fertile homozygous Plc $\gamma$ 2-P522R line (**Fig. S1**).

69 *The P522R variant increases Plc $\gamma$ 2 enzyme activity and enhances survival, phagocytosis, and*  
70 *inflammatory response*

71 Bone marrow-derived macrophage (BMDM) cultures were established from *femur* and *tibia* bones of  
72 six-month-old Plc $\gamma$ 2-P522R KI mice and their wild type (WT) littermates [10-12]. The P522R variant  
73 has previously been shown to increase the production of inositol phosphate (Ip1, a surrogate of Ip3)

74 and intracellular calcium release in transiently transfected HEK293 and COS cells [13]. To assess  
75 Plc $\gamma$ 2 enzyme activity in KI myeloid cells, Ip1 formation was measured from BMDM lysates as  
76 previously described [6, 13]. A significantly higher basal Ip1 levels was detected in cultured KI  
77 BMDMs as compared to WT cells, and treatment with the phospholipase C agonist m-3M3FBS [7]  
78 further increased the levels of Ip1 in both, KI and WT cells (**Fig. 1C**). Thus, these findings indicate  
79 that the P522R variant exerts a hypermorphic effect on the basal enzyme activity of Plc $\gamma$ 2 in cultured  
80 mouse macrophages.

81 Next, we examined the functional consequences of increased Plc $\gamma$ 2 activity in cultured BMDMs. A  
82 cytotoxicity assay revealed significantly lower levels of lactate dehydrogenase (LDH) in the  
83 conditioned medium of KI BMDMs as compared to WT cells after withdrawal of macrophage colony  
84 stimulation factor (m-CSF) (**Fig 1D**), suggesting that the protective variant mitigates entering of  
85 BMDMs to an apoptotic state. Importantly, Trem2 deficiency has been shown to compromise the  
86 survival of microglia and peripheral macrophages [12-15], whereas antibody-mediated stabilization of  
87 mature Trem2 strongly enhances the survival and proliferation of BMDMs (Schlepckow et al., EMBO  
88 Mol Med, in press) [16]. This supports the idea that Trem2 and Plc $\gamma$ 2 act on the same pathway (see  
89 **Fig. 1A**), and that the Trem2 risk and Plc $\gamma$ 2 protective variants have opposite effects on cell fate.

90 Activation of the Trem2 pathway is also known to enhance phagocytosis, a beneficial cellular process  
91 removing  $\beta$ -amyloid, apoptotic neurons, and other pathological substances in the aging or diseased  
92 brain [11, 12, 17, 18]. Here, imaging of pHrodo-labeled bioparticle uptake by BMDMs showed a  
93 trend towards higher phagocytic activity in KI as compared to WT cells (**Fig 1E**). To confirm that the  
94 protective variant enhances phagocytosis, cDNAs encoding human PLC $\gamma$ 2-WT and PLC $\gamma$ 2-P522R  
95 were expressed in microglia-like BV2-cells. Significantly higher fluorescence intensity was detected  
96 in BV2-cells overexpressing the P522R variant as compared to those overexpressing PLC $\gamma$ 2-WT or a  
97 control plasmid (**Fig 1F**). Simultaneously, the overall percentage of phagocytic cells was only  
98 marginally higher in BV2-cells overexpressing the PLC $\gamma$ 2-P522R variant, suggesting that the  
99 phagocytic capacity per cell was increased.

100 Plc $\gamma$ 2 has been suggested to promote Nf $\kappa$ b-mediated innate immune response and cytokine production  
101 in peripheral immune cells [19]. To assess an acute response of the BMDMs to an inflammatory  
102 stimulus, the cells were treated with lipopolysaccharide (LPS) and interferon-gamma (IFN $\gamma$ ) for three  
103 hours. BMDMs from KI mice released significantly higher levels of tumor necrosis factor- $\alpha$ , (TNF $\alpha$ ),  
104 interleukin-6 (IL-6), and -1 $\beta$  (IL-1 $\beta$ ) into the culture medium (**Fig. 1G**), suggesting that macrophages  
105 expressing the P522R variant display stronger and/or faster response to the stimulus. Despite higher  
106 cytokine secretion, significantly lower levels of nitric oxide (NO) were detected in the culture medium  
107 of KI BMDMs. Importantly, the IFN $\gamma$ -induced production of NO exacerbates apoptosis and  
108 compromises cell viability in a variety of cell types. Furthermore, the neurotoxic effect of activated  
109 microglia is largely mediated by NO [20-22]. Thus, our observation supports the idea that the P522R  
110 variant protects cells upon different stress conditions.

111 *The mRNA profile associated with Plc $\gamma$ 2-P522R suggests activation of microglia and modulation of*  
112 *Plc $\gamma$ 2 signaling*

113 Next, we searched for potential molecular changes in the brain of six-month old KI and WT male  
114 mice. Changes in total brain mRNA expression were determined utilizing a Nanostring  
115 neuropathology gene expression panel. Out of 770 analyzed genes, 57 (7%) were significantly up- and  
116 32 (4%) significantly downregulated in the brain of KI as compared to WT mice (**Fig. 2A**). Notably,  
117 several genes directly linked to Plc $\gamma$ 2 signaling (e.g. *Itpr1*, *Camk2d*, *Mapk3/Erk1*, *Rac1*, and *Rhoa*)  
118 showed a significantly elevated expression in the KI mouse brain (**Fig 2B**). *Itpr1* encodes an Ip3  
119 receptor and acts directly downstream of Plc $\gamma$ 2. Similarly, Mapk/Erk-signaling is induced by Plc $\gamma$ 2  
120 activation [6] and regulates pathways related to survival, proliferation, differentiation, and  
121 inflammatory responses in brain immune cells and other cell types [23]. Rac1 and RhoA can be  
122 activated in a Plc $\gamma$ 2 and/or Mapk/Erk-dependent manner [24-25] and play pivotal roles in microglia  
123 activation, migration, phagocytosis, and neuronal loss [27-29]. Thus, the higher expression of such  
124 targets could be directly associated with Plc $\gamma$ 2-dependent Ip3 signaling and is in line with improved  
125 survival, inflammatory response, and phagocytosis observed in KI macrophages.

126 Pathway analysis demonstrated a significant upregulation of microglia activation among several other  
127 biological pathways in the brain of KI as compared to the WT mice (**Fig 2C**). Recent transcriptomic  
128 studies in CNS immune cells have identified a unique subtype of disease-associated microglia  
129 (DAM), which is characterized by high expression of pro-survival, lipid metabolism, and  
130 phagocytosis-associated genes [30, 31]. Activation of DAM is driven in a Trem2-dependent manner  
131 and it is essential for impeding AD-related  $\beta$ -amyloid pathology [31]. To assess whether the  
132 protective variant shifts microglia towards the DAM phenotype, expression of DAM signature genes  
133 was examined. A significant upregulation of *ApoE*, which is one of the key upregulated DAM genes in  
134 microglia [30-32], was detected in the brain of KI mice (**Fig. 2A**), while other targets, such as *Trem2*,  
135 *Itgax*, and *Cd68*, remained unchanged. Additional qPCR-based analyses of microglia-specific DAM  
136 genes showed a trend towards increased expression of *Cst7*, *Tyrolbp*, *Clec7a*, and *Ccl3* in the brain of  
137 KI mice (**Fig. S2**). Moreover, a significant upregulation of an astrocytic marker, *Gfap*, was found in  
138 the brain of KI mice (**Fig. 2A**). Immunohistochemical analysis revealed a significantly stronger  
139 staining of *Gfap* and a hypertrophic morphology of astrocytes in the hippocampus of KI as compared  
140 to WT mice (**Fig. 2D**). This is an interesting finding also in the context of *Plc $\gamma$ 2-P522R*-associated  
141 RNA profile as *ApoE* is primarily expressed in the astrocytes. Collectively, these results suggest a  
142 potentially beneficial crosstalk between activated microglia and reactive astrocytes in the  
143 hippocampus of *Plc $\gamma$ 2-P522R* KI mice.

#### 144 *The Plc $\gamma$ 2-P522R protective variant increases microglia activation in the brain of KI mice*

145 Finally, we elucidated the activation state of microglia in the *Plc $\gamma$ 2-P522R* KI mice *in vivo* by  
146 conducting PET imaging using the <sup>18</sup>F-FEPPA radioligand specific for the translocator protein of 18  
147 kDa [33, 34]. A significant increase in <sup>18</sup>F-FEPPA signal was detected in KI compared to WT mice  
148 in all analyzed brain areas in one-year-old female mice (**Fig. 3A**). Interestingly, reduced microglia  
149 activation has been observed in mice carrying *Trem2* loss-of-function mutations [12, 35, 36],  
150 suggesting that the protective *Plc $\gamma$ 2-P522R* variant and the risk-increasing *Trem2* variants exert  
151 opposite effects on microglia function. Furthermore, impaired microglia activation has been shown to  
152 correlate with reduced cerebral glucose metabolism. However, microglial hyperactivation in *Gm*

153 knockouts also leads to reduced cerebral glucose metabolism [12,36] demonstrating that the two  
154 extremes of microglial activation states are both deleterious. To prove, if the microglial activation  
155 triggered by the *Plcγ2*-P522R variant affects glucose metabolism, we measured cerebral metabolic  
156 rate of glucose using 18F-FDG-PET [33]. FDG-PET did not detect significant differences in any of  
157 the brain regions studied nor any correlation between 18F-FEPPA and 18F-FDG signals supporting  
158 the idea that the *Plcγ2*-P522R variant supports a protective microglial activation state.

159 In conclusion, our results suggest that the protective *Plcγ2*-P522R variant potentiates the primary  
160 function of *Plcγ2* and enhances important immune cell functions *in vitro* and microglia activation *in*  
161 *vivo*. Although further studies focusing on the microglia-specific effects of the *Plcγ2*-P522R variant  
162 upon AD-associated stress are required, the present findings may indicate protective pre-priming of  
163 microglia, which could be beneficial in the brain in neurodegenerative conditions.

## 164 **METHODS**

### 165 *Animals*

166 *Plcγ2*-P522R KI mice were generated by CRISPR/Cas9-assisted gene editing in mouse zygotes as  
167 described previously [8, 9, 12]. Briefly, pronuclear stage zygotes were obtained by mating C57BL/6J  
168 males with superovulated C57BL/6J females (Charles River). Embryos were then microinjected into  
169 the male pronucleus with an injection mix containing *Plcγ2*-specific CRISPR/Cas9 ribonucleoprotein  
170 (RNP) complexes. RNPs consisted of 50 ng/μl S.p. Cas9 HiFi protein (IDT), 0.6 μM crRNA  
171 (protospacer CCAAATGCAGCTCCGTGGG; IDT), 0.6 μM tracrRNA (IDT), and 25 ng/μl  
172 mutagenic single-stranded oligodeoxynucleotide (ssODN) (5' -  
173 CGCACTGGTCTACTCTCCACCTTCTTGTGGAACCATTTCTCCCCAAAATGCAGCTCCGTA  
174 GGCCTAGTGTCTGAGCCACAAGCATCCGAAAGGGCTTATTACAGCTCGCTCTGCCCTCT  
175 CCTGA□3'), comprising the P522R substitution and an additional silent mutation for genotyping  
176 purposes (IDT; see also Fig 1B). After microinjection, zygotes were cultured in KSOM medium until  
177 they were transferred into pseudopregnant CD-1 foster animals. To identify putative off-target sites  
178 of the *Plcγ2*-specific guideRNA, the online tool CRISPOR (<http://crispor.tefor.net/>) was used. For

179 analysis, genomic DNA of WT and heterozygous *Plcγ2*-P522R mice was isolated and predicted loci  
180 with a CFD score  $\geq 0.4$  and an MIT score  $\geq 0.5$  were PCR-amplified and Sanger sequenced.  
181 Animals without off-target mutations were used for generation of homozygous *Plcγ2*-P522R KI  
182 strain. Animals were raised and handled at the DZNE, Munich, and at the Laboratory Animal Center  
183 of the University of Eastern Finland, Kuopio. All animal experiments were carried out in accordance  
184 with the guidelines of the European Community Council Directives 86/609/EEC and approved by the  
185 Bavarian government and the Animal Experiment Board of Finland (ESAVI 21203-2019, EKS-004-  
186 2019).

#### 187 *Mouse genotyping*

188 Genomic DNA was purified from ear biopsies by isopropanol precipitation. The *Plcγ2* locus  
189 harboring the KI mutation was amplified by PCR using forward primer 5'-  
190 GCTGTCCTTCGGTGATGACA -3' and reverse primer 5'- CAGACCGCCTGTTGGGAATA -3'.  
191 Resulting PCR products of 825 base pairs (bp) were further processed using the restriction enzyme  
192 *StuI* digesting the mutant KI allele into 412, 275, and 138bp fragments and WT to 412 and 413bp  
193 fragments. Fragments were subsequently detected from 1,5% agarose gel electrophoresis. The  
194 genotype of each mouse was verified by Sanger sequencing from the purified PCR product.

#### 195 *Preparation of BMDM cultures*

196 At the age of six months, KI male mice and their age- and gender-matched WT littermates were  
197 anesthetized with Ketamine-Xylazine mixture prior to trans-cardiac perfusion with ice cold saline  
198 (PBS). *Femur* and *tibia* bones were collected and processed for generation of BMDM cultures as  
199 described previously [10-12]. Briefly, bone marrow cells were flushed out using advanced RPMI  
200 1640 medium (Life Technologies). Cells were differentiated for seven days in advanced RPMI 1640  
201 supplemented with 2mM L-Glutamine, 10% (v/v) heat-inactivated fetal calf serum (FCS), 100U/ml  
202 penicillin, 100μg/ml streptomycin and 50ng/ml macrophage colony stimulation factor 1 (m-CSF)  
203 (R&D System) in non-cell culture treated dishes. After seven days in culture, macrophages were  
204 carefully scraped, counted, and plated in optimal densities for subsequent analyses.



205 *Ip1 assay*

206 Ip1 has been used as a standard readout when analyzing earlier identified *PLC $\gamma$ 2* variants in the  
207 previous studies [6, 13]. To measure Ip1 formation, 50000 KI (n=4) and WT (n=4) BMDMs per well  
208 were plated on a 96-well plate and allowed to attach overnight. IP-1 ELISA (Cisbio) assay was then  
209 used according to the manufacturer's instructions. Some cells were treated with 25 $\mu$ M phospholipase  
210 C agonist, m-3M3FBS [7]. Ip1 concentration in each sample was calculated from the net optical  
211 density values using a standard curve. Values were normalized to the total protein concentration  
212 within each sample measured from the replicate wells. Data are normalized to the WT group and  
213 presented as mean  $\pm$  SD.

214 *LDH cytotoxicity assay*

215 For cytotoxicity assays, 10000 KI (n=4) and WT (n=3) BMDMs per 96-well plate well were seeded in  
216 RPMI 1640 (without phenol red) supplemented with 2mM L-Glutamine, 1% (v/v) heat-inactivated  
217 FCS, 100U/ml penicillin, and 100 $\mu$ g/ml streptomycin, and 50ng/ml m-CSF. After the cells were  
218 attached, the medium was replaced with m-CSF-depleted medium. Medium samples from triplicate  
219 wells per sample were collected 4h, 24h and 48h after m-CSF withdrawal. To determine maximum  
220 LDH release in each sample, replicate wells were treated with 2% Triton X-100 solution before  
221 medium collection. LDH cytotoxicity was measured according to the Cytotoxicity Detection Kit  
222 (LDH, Roche) protocol. LDH levels in each sample were normalized to the maximum LDH release in  
223 the corresponding sample. Data are normalized to the WT BMDMs and presented as mean  $\pm$  SD.

224 *BMDM Phagocytosis assay*

225 For phagocytosis assays, 10000-20000 KI (n=7) and WT (n=6) BMDMs were plated on a 96 well  
226 plate one day prior to the assay. The assay was repeated in two independent experiments.  
227 Phagozytosis was initiated by adding 5 $\mu$ g/well pHrodo-labeled bioparticles (pHrodo™ Red Zymosan  
228 BioParticles™ Conjugate for Phagocytosis, ThermoFisher Scientific, P35364) with or without 10  $\mu$ M  
229 Cytochalasin D. Four fluorescent images per well with 300ms red channel acquisition time were taken  
230 every 15 minutes in total for three-hours using a 20x objective with the IncuCyte® S3 Live-Cell

231 Analysis System (Sartorius). At the end of the assay, cells were incubated with 1 $\mu$ M Vybrant™  
232 DyeCycle™ Green Stain (Invitrogen) for 0.5h and stained cell nuclei were imaged with 250ms green  
233 channel acquisition time for counting cells. Images were analyzed using the IncuCyte™ Analysis  
234 Software. pHrodo red fluorescence area averaged from four images taken per well were normalized to  
235 the corresponding cell count. Red fluorescent area was normalized to the WT group at the latest  
236 timepoint and shown as mean  $\pm$  SEM.

#### 237 *BV2 cell transfection and phagocytosis assay*

238 pLenti-C-Myc-DDK (control) and human PLC $\gamma$ 2-myc-DDK (WT) in pLenti-C backbone vectors  
239 were obtained from OriGene (PS100064, RC200442L1). PLC $\gamma$ 2-myc-DDK was subjected to site-  
240 directed mutagenesis (QuikChange Lightning Multi Site-Directed Mutagenesis Kit, Agilent, 210515)  
241 to create PLC $\gamma$ 2-P522R-myc-DDK (P522R) constructs. Briefly, the pLenti-PLC $\gamma$ 2-myc-DDK plasmid  
242 was amplified using a single mutagenic primer (5'-  
243 AGTGCCCCAGGATATACGCCCTACAGAACTAC-3'). Subsequently, the original plasmid was  
244 digested with DpnI restriction enzyme and the remaining mutagenized plasmid was transformed into  
245 XL10-Gold® ultracompetent cells (Agilent). Integrity of the insert sequence and introduction of the  
246 point mutation were confirmed by Sanger sequencing of the isolated plasmid DNA.

247 For phagocytosis assays, BV2 microglia cells were transfected using Viromer Yellow kit (Lipocalyx)  
248 according to the manufacturer's instructions with small adjustments. In brief, 50000 BV2 cells per  
249 well were seeded on a 12-well plate in RPMI 1640 (without phenol red) supplemented with 2mM L-  
250 Glutamine, 1% (v/v), fetal calf serum (FCS), 100U/ml penicillin, and 100 $\mu$ g/ml streptomycin one day  
251 prior to the transfection. One  $\mu$ g of WT, P522R, or control (CTRL) plasmids together with 0,32 $\mu$ l of  
252 Viromer Yellow in 100 $\mu$ l of Viromer Yellow buffer per well were used for transfections. Transfection  
253 medium was replaced four hours after transfections started. On the next day, cells were washed with  
254 PBS and incubated with pHrodo-labeled bioparticles (pHrodo™ Green E. coli BioParticles™  
255 Conjugate for Phagocytosis, ThermoFisher Scientific) in OptiMem for three hours at +37°C. Cells  
256 were then washed with PBS, gently scraped in flow cytometry buffer (1% FCS, 2mM EDTA in PBS)  
257 and transferred to v-shaped 96-well plates. Non-viable cells were excluded by staining with 7-AAD

258 Staining Solution (Abcam) for five minutes and pHrodo fluorescent signal was analyzed from 20000  
259 live cells by flow cytometry. Fluorescent signals were normalized to unstained (no pHrodo-labeled  
260 bioparticles) control within each group. Phagocytic activity is shown as geometric median of the  
261 fluorescence intensity (MFI) and as % of phagocytic cells within the analyzed cell population as mean  
262  $\pm$  SD. MFI was normalized to the WT group.

263 Overexpression of the PLC $\gamma$ 2 WT and P522R plasmids was verified by Western blotting as described  
264 [37], using rabbit anti-PLC $\gamma$ 2 (1:1000, Cell Signaling Technologies) antibody, mouse anti-Myc  
265 (1:1000, Millipore) antibody, and mouse anti- $\beta$ -actin (1:1,000, Abcam) antibody with respective  
266 secondary antibodies (1:5000, GE Healthcare).

#### 267 *TNF $\alpha$ , IL-6, and IL-1 $\beta$ ELISA and NO assay*

268 To address acute inflammatory responses, one million KI (n=4) and WT (n=3) BMDMs were plated  
269 on six-well plates and allowed to attach. Cells were then treated with 1 $\mu$ g/ml LPS and 20ng/ml IFN- $\gamma$   
270 in PBS or with vehicle (PBS) for three hours. Afterwards, media were collected and the levels of  
271 TNF $\alpha$ , IL-6, and IL-1 $\beta$  were determined using Mouse TNF alpha, IL-6, and IL-1 beta ELISA Ready-  
272 SET-Go!<sup>TM</sup> kits, respectively (Invitrogen<sup>TM</sup>, eBioscience<sup>TM</sup>). Cytokine levels were normalized to the  
273 total protein concentration in the lysate measured with BCA protein assay kit (Thermo Scientific). NO  
274 levels were analyzed using Griess Reagent Kit for Nitrite Determination (G-7921, Life Technologies)  
275 and normalized to the total protein concentration within the corresponding lysate. All kits were used  
276 as instructed by the manufacturers. Data are normalized to the WT BMDMs and presented as mean  $\pm$   
277 SD.

#### 278 *NanoString gene expression analysis*

279 Brains of the same six-month old KI and WT mice used for establishing the BMDM cultures were  
280 removed after transcardial perfusion and dissected into two hemispheres. Frozen right hemibrain was  
281 crunched in liquid nitrogen and 10-20mg of pulverized mouse brain was used for RNA extraction  
282 with RNeasy Plus Mini Kit (Qiagen). RNA concentration and quality were determined using Agilent  
283 RNA 6000 Nano Kit according to the manufacturer's recommendations. Gene expression data of the

284 KI (n=3) and WT (n=3) mice were generated with the mouse neuropathology gene expression panel  
285 of the *NanoString* Technologies using the nCounter system. Gene expression data were analyzed  
286 using nSolver Advanced analysis software (*NanoString* Technologies) with build-in quality control,  
287 normalization, and statistical analyses. Expression data of significantly altered genes for individual  
288 animals are shown as Log<sub>2</sub>-transformed fold changes. Themes annotated with individual genes are  
289 derived from the *NanoString* Neuropathology panel. Pathway analysis was done using pathway  
290 annotations provided by the panel.

### 291 *RT-qPCR analysis*

292 For RT-qPCR analysis, RNA was reverse-transcribed into cDNA using the SuperScript III  
293 First-Strand Synthesis System (Thermo Fisher Scientific) according to the manufacturer's protocol.  
294 Target specific PCR primers for mouse *Cst7* (5'-GTGAAGCCAGGATTCCCCAA-3' and 5'-  
295 GCCTTTCACCACTGTACCA-3), *Ccl3* (5'-CCAGCCAGGTGTCATTTTCC-3' and 5'-  
296 AGTCCCTCGATGTGGCTACT-3'), and *Ctsd* (5'-AATCCCTCTGCGCAAGTTCA-3' and 5'-  
297 CGCCATAGTACTGGGCATCC-3') were obtained from TAG Copenhagen. FastStart Universal  
298 SYBR Green Master (Roche) was used for qPCR. The comparative  $\Delta\Delta C_t$  method was used to  
299 calculate *Gapdh* (5'-CAGGAGAGTGTTTCCTCGTCC-3 and 5'-TTCCCATTCTCGGCCTTGAC-  
300 3')-normalized expression levels of the target mRNAs. Expression of *Tyrobp* (Mm.PT.58.6069426,  
301 IDT), *Clec7a* (Mm.PT.58.42049707, IDT), and *Plcy2* (Mm01242530\_m1, Thermo Fisher Scientific)  
302 were determined with mouse TaqMan assays and normalized to the expression of *Actb*  
303 (Mm.PT.39a.22214843.g, IDT) in the corresponding samples. Data are normalized to the expression  
304 levels in the WT group and shown as mean  $\pm$  SD.

### 305 *Immunofluorescence analyses and confocal imaging*

306 Following cardiac perfusion, left-brain hemispheres were immerse-fixed in 4% paraformaldehyde for  
307 24h, followed by 30% sucrose for 24h. After freezing, 50 $\mu$ m microtome cut free floating sections  
308 were washed briefly and then blocked using 5% donkey serum for one hour at room temperature.  
309 Sections were then incubated with a Gfap antibody (1:500, Thermo Fisher Scientific) at 4°C

310 overnight. Sections were washed and incubated in secondary antibody (donkey anti-rabbit 5551:1000,  
311 Thermo Fisher Scientific) for two hours at room temperature. Lastly, slides were washed and stained  
312 with 4',6-Diamidin-2-phenylindol (DAPI, 5 $\mu$ g/ml) before mounting coverslips with Prolong<sup>TM</sup> Gold  
313 Antifade reagent (Thermo Fisher Scientific). Images were acquired using a LSM 710 confocal  
314 microscope (Zeiss) and the ZEN 2011 software package (black edition, Zeiss). Laser and detector  
315 settings were maintained constant for the acquisition. For analyses, at least three images were taken  
316 per slide using 10x (Plan-Apochromat 10x/0.45 M27) objective. For Gfap coverage analysis, confocal  
317 acquired images for cortex or hippocampus were imported to FIJI, and channels were separated by  
318 “Image/Color/Split Channels”. Following this, background noise was removed using Gaussian  
319 filtering and intensity distribution for each image was equalized using rolling ball algorithm. All  
320 layers from a single image stack were projected on a single slice by “Stack/Z projection”. Lastly,  
321 Gfap-positive staining was segmented using automatic thresholding method “Moments” in FIJI. Data  
322 are presented as mean  $\pm$  SD.

### 323 *PET-imaging*

324 For PET imaging, one-year-old KI (n=3) and WT (n=4) female mice were anesthetized with  
325 isoflurane (1.5% with N<sub>2</sub>/O<sub>2</sub> 70%/30% through nose cone). The mice were placed on a heated animal  
326 holder on the scanner bed in a prone position and secured with tape to prevent movement during  
327 scanning. The mice were imaged using a dedicated PET scanner (Inveon DPET, Siemens Healthcare)  
328 and immediately afterwards with CT (Flex SPECT/CT, Gamma Medica, Inc.) for anatomical  
329 reference images using the same animal holder. Dynamic imaging of 70 minutes was started at the  
330 time of the administration of the activity (18F-FEPPA: 15.8  $\pm$  1.4 MBq and 18F-FDG: 13.9  $\pm$  1.2  
331 MBq) through the tail vein. Data were gathered in list-mode form, and corrected for dead-time,  
332 randoms, scatter and attenuation. Regions of interest (ROIs) were drawn for whole brain (excluding  
333 cerebellum and olfactory bulb), cerebellum, pons, hippocampus and frontal cortex using Carimas 2.10  
334 software (Turku PET Centre, Finland). Also, for image derived input function (IDIF) a ROI was  
335 drawn for the *veca cava*. Logan analysis for 18F-FEPPA-data and Patlak analysis for 18F-FDG data

336 was done using the IDIF to estimate the inflammation and cerebral glucose metabolism respectively  
337 for the brain ROIs.

### 338 *Statistical analyses*

339 Statistical significance between groups was tested using independent samples *t*-test or Mann-Whitney  
340 U test depending whether the data fulfilled the assumptions for parametric tests or with two-way  
341 ANOVA (more than two groups) followed by LSD post-hoc test. Gene expression data were analyzed  
342 using nSolver Advanced analysis software (NanoString Technologies) with build-in quality control,  
343 normalization, and statistical analyses. Immunohistochemical data were checked for normality using  
344 the Shapiro-Wilk method, the D'Agostino and Pearson, as well as the Kolmogorov-Smirnov normality  
345 tests. Statistical significance was calculated using two-tailed unpaired *t*-test. All statistical analyses  
346 were performed using IBM SPSS Statistics 25 or GraphPad Prism software. A threshold for statistical  
347 significance was set at  $p < 0.05$ .

### 348 **List of abbreviations**

349 Plc $\gamma$ 2, phospholipase C gamma 2; Pip2, phosphatidylinositol 4,5-bisphosphate; Ip3, 1,4,5-  
350 trisphosphate; Dag, diacylglycerol; Trem2, Triggering receptor expressed on myeloid cells 2; Nfkb,  
351 nuclear factor kappa-light-chain-enhancer of activated B cells; Mapk/Erk, mitogen-activated protein  
352 kinase; Akt, protein kinase B; KI, knock-in; WT, wild type; BMDM, bone marrow-derived  
353 macrophage; Ip1, inositol monophosphate; LPS, lipopolysaccharide; IFN $\gamma$  interferon gamma; TNF $\alpha$ ,  
354 tumor necrosis factor alpha; IL-6 interleukin-6; IL-1 $\beta$ , interleukin 1 beta; NO, nitric oxide; DAM,  
355 disease associated microglia

### 356 **Declarations**

### 357 **Ethics approval and consent to participate**

358 Animals were raised and handled at the DZNE, Munich, and at the Laboratory Animal Center of the  
359 University of Eastern Finland, Kuopio. All animal experiments were carried out in accordance with  
360 the guidelines of the European Community Council Directives 86/609/EEC and approved by the

361 Bavarian government and the Animal Experiment Board of Finland (ESAVI 21203-2019, EKS-004-  
362 2019).

### 363 **Consent for publication**

364 Not applicable

### 365 **Availability of data and materials**

366 All data generated or analysed during this study are included in this published article and its  
367 supplementary information files.

### 368 **Competing interests**

369 C.H. collaborates with Denali Therapeutics, is the chief scientific advisor of ISAR Biosciences,  
370 participated on one advisory board meeting of Biogen, and received a speaker honorarium from  
371 Novartis and Roche. M.H. is a member of global diagnostics AD-board, Roche.

### 372 **Funding**

373 This work was funded by the Deutsche Forschungsgemeinschaft (DFG, German Research  
374 Foundation) under Germany's Excellence Strategy within the framework of the Munich Cluster for  
375 Systems Neurology (EXC 2145 SyNergy – ID 390857198). Study was also supported by Academy of  
376 Finland (grant numbers 307866, 315459); Sigrid Jusélius Foundation; the Strategic Neuroscience  
377 Funding of the University of Eastern Finland; JPco-fuND2 2019 Personalised Medicine for  
378 Neurodegenerative Diseases (grant number 334802); Horizon 2020 Framework Programme of the  
379 European Union (Marie Skłodowska Curie grant agreement No 740264); Orion Research Foundation  
380 and Emil Aaltonen Foundation.

### 381 **Authors' contributions**

382 MT, MH and CH designed the study, interpreted the data and wrote the paper. MT also designed  
383 experiments, collected and processed cell and brain samples, generated functional and RNA data,  
384 performed related analyses, and generated the figures. RW generated PLC $\gamma$ 2 variant plasmids and RW

385 and HM performed phagocytosis assays of the BMDM cells. BW designed and generated the knock-  
386 in mouse line. SP performed immunohistochemical staining and related analyses. TK assisted in the  
387 processing of the NanoString data. KJ performed a FEPPA and FDG-PET imaging and related data  
388 analysis for one-year-old mice. PP produced FEPPA and FDG ligands for PET imaging. XX helped  
389 with processing the RNA samples. PM assisted with the sample collection and ELISA assays. MM  
390 and AH assisted with the data interpretation and revised the manuscript. All authors read and  
391 approved the final manuscript.

## 392 **Acknowledgements**

393 We thank Mrs. Maarit Pulkkinen for her expert technical assistance with PET imaging.

## 394 **References**

- 395 1. Sims R, van der Lee SJ, Naj AC, Bellenguez C, Badarinarayan N, Jakobsdottir J, et al. Rare  
396 coding variants in *PLCG2*, *ABI3*, and *TREM2* implicate microglial-mediated innate  
397 immunity in Alzheimer's disease. *Nat Genet.* 2017;49:1373-1384.
- 398 2. van der Lee SJ, Conway OJ, Jansen I, Carrasquillo MM, Kleineidam L, van den Akker E, et  
399 al. A nonsynonymous mutation in *PLCG2* reduces the risk of Alzheimer's disease, dementia  
400 with Lewy bodies and frontotemporal dementia, and increases the likelihood of longevity.  
401 *Acta Neuropathol.* 2019;138:237-250.
- 402 3. Marttinen M, Takalo M, Natunen T, Wittrahm R, Gabbouj S, Kemppainen S, Leinonen V,  
403 Tanila H, Haapasalo A, Hiltunen M. Molecular Mechanisms of Synaptotoxicity and  
404 Neuroinflammation in Alzheimer's Disease. *Front Neurosci.* 2018;12:963.
- 405 4. Deczkowska A, Keren-Shaul H, Weiner A, Colonna M, Schwartz M, Amit I. Disease-  
406 Associated Microglia: A Universal Immune Sensor of Neurodegeneration. *Cell.*  
407 2018;173:1073-1081.
- 408 5. Yu P, Constien R, Dear N, Katan M, Hanke P, Bunney TD, Kunder S, Quintanilla-Martinez  
409 L, Huffstadt U, Schröder A, Jones NP, Peters T, Fuchs H, de Angelis MH, Nehls M, Grosse J,  
410 Wabnitz P, Meyer TP, Yasuda K, Schiemann M, Schneider-Fresenius C, Jagla W, Russ A,



- 411 Popp A, Josephs M, Marquardt A, Laufs J, Schmittwolf C, Wagner H, Pfeffer K, Mudde GC.  
412 Autoimmunity and inflammation due to a gain-of-function mutation in phospholipase C  
413 gamma 2 that specifically increases external Ca<sup>2+</sup> entry. *Immunity*. 2005;22:451-65.
- 414 6. Zhou Q, Lee GS, Brady J, Datta S, Katan M, Sheikh A, Martins MS, Bunney TD, Santich  
415 BH, Moir S, Kuhns DB, Long Priel DA, Ombrello A, Stone D, Ombrello MJ, Khan J, Milner  
416 JD, Kastner DL, Aksentijevich I. A hypermorphic missense mutation in PLCG2, encoding  
417 phospholipase C<sub>2</sub>, causes a dominantly inherited autoinflammatory disease with  
418 immunodeficiency. *Am J Hum Genet*. 2012;91:713-20.
- 419 7. Chae JJ, Park YH, Park C, Hwang IY, Hoffmann P, Kehrl JH, Aksentijevich I, Kastner DL.  
420 Connecting two pathways through Ca<sup>2+</sup> signaling: NLRP3 inflammasome activation induced  
421 by a hypermorphic PLCG2 mutation. *Arthritis Rheumatol*. 2015;67:563-7.
- 422 8. Wefers B, Bashir S, Rossius J, Wurst W, Kühn R. Gene editing in mouse zygotes using the  
423 CRISPR/Cas9 system. *Methods [Internet]*. Elsevier Inc. 2017;121–122:55–67.
- 424 9. Xiang X, Piers TM, Wefers B, Zhu K, Mallach A, Brunner B, Kleinberger G, Song W,  
425 Colonna M, Herms J, Wurst W, Pockock JM, Haass C. The Trem2 R47H Alzheimer's risk  
426 variant impairs splicing and reduces Trem2 mRNA and protein in mice but not in humans.  
427 *Mol Neurodegener*. 2018;13:49.
- 428 10. Marim FM, Silveira TN, Lima DS, Zamboni DS. A method for generation of bone marrow-  
429 derived macrophages from cryopreserved mouse bone marrow cells. *PLoS One*. [Internet]  
430 2010;5:1–8.
- 431 11. Xiang X, Werner G, Bohrmann B, Liesz A, Mazaheri F, Capell A, et al. TREM2 deficiency  
432 reduces the efficacy of immunotherapeutic amyloid clearance. *EMBO Mol. Med*. [Internet]  
433 2016;8:992–1004.
- 434 12. Kleinberger G, Brendel M, Mracsko E, Wefers B, Groeneweg L, Xiang X, Focke C, Deußing  
435 M, Suárez-Calvet M, Mazaheri F, Parhizkar S, Pettkus N, Wurst W, Feederle R, Bartenstein ,  
436 Mueggler T, Arzberger T, Knuesel I, Rominger A, Haass C. The FTD-like syndrome causing  
437 TREM2 T66M mutation impairs microglia function, brain perfusion, and glucose metabolism.  
438 *EMBO J*. 2017;36:1837-1853.

- 439 13. Magno L, Lessard CB, Martins M, Lang V, Cruz P, Asi Y, Katan M, Bilslund J, Lashley T,  
440 Chakrabarty P, Golde TE, Whiting PJ. Alzheimer's disease phospholipase C-gamma-2  
441 (PLCG2) protective variant is a functional hypermorph. *Alzheimers Res Ther.* 2019;11(1):16.
- 442 14. Wu K, Byers DE, Jin X, Agapov E, Alexander-Brett J, Patel AC, Cella M, Gilfilan S,  
443 Colonna M, Kober DL, Brett TJ, Holtzman MJ. TREM-2 promotes macrophage survival and  
444 lung disease after respiratory viral infection. *J Exp Med.* 2015;212:681-97.
- 445 15. Prokop S, Miller KR, Labra SR, Pitkin RM, Hoxha K, Narasimhan S, Changolkar L,  
446 Rosenbloom A, Lee VM, Trojanowski JQ. Impact of TREM2 risk variants on brain region-  
447 specific immune activation and plaque microenvironment in Alzheimer's disease patient brain  
448 samples. *Acta Neuropathol.* 2019;138:613-630.
- 449 16. Schlepckow K, Monroe KM, Kleinberger G, Cantuti-Castelvetri L, Parhizkar S, Xia D,  
450 Willem M, Werner G, Pettkus N, Brunner B, Sülzen A, Nuscher B, Hampel H, Xiang X,  
451 Feederle R, Tahirovic S, Park JI, Prorok R, Mahon C, Liang C, Shi J, Kim D, Sabelström H,  
452 Huang F, Di Paolo G, Simons M, Lewcock JW, Haass C. Enhancing protective microglia  
453 activities with a dual function TREM2 antibody to the stalk region. *EMBO Mol Med*, in  
454 press.
- 455 17. N'Diaye EN, Branda CS, Branda SS, Nevarez L, Colonna M, Lowell C, Hamerman JA,  
456 Seaman WE. TREM-2 (triggering receptor expressed on myeloid cells 2) is a phagocytic  
457 receptor for bacteria. *J Cell Biol.* 2009;184:215-23.
- 458 18. Kleinberger G, Yamanishi Y, Suárez-Calvet M, Czirr E, Lohmann E, Cuyvers E, Struyfs H,  
459 Pettkus N, Wenninger-Weinzierl A, Mazaheri F, Tahirovic S, Lleó A, Alcolea D, Fortea J,  
460 Willem M, Lammich S, Molinuevo JL, Sánchez-Valle R, Antonell A, Ramirez A, Heneka  
461 MT, Sleegers K, van der Zee J, Martin JJ, Engelborghs S, Demirtas-Tatlidede A, Zetterberg  
462 H, Van Broeckhoven C, Gurvit H, Wyss-Coray T, Hardy J, Colonna M, Haass C. TREM2  
463 mutations implicated in neurodegeneration impair cell surface transport and phagocytosis. *Sci*  
464 *Transl Med.* 2014;6:243ra86. doi: 10.1126/scitranslmed.3009093.

- 465 19. Xu S, Huo J, Lee KG, Kurosaki T, Lam KP. Phospholipase Cgamma2 is critical for Dectin-1-  
466 mediated Ca<sup>2+</sup> flux and cytokine production in dendritic cells. *J Biol Chem.* 2009;284:7038-  
467 46.
- 468 20. Monsonego A1, Immitola J, Zota V, Oida T, Weiner HL. Microglia-mediated nitric oxide  
469 cytotoxicity of T cells following amyloid beta-peptide presentation to Th1 cells. *J Immunol.*  
470 2003;171:2216-24.
- 471 21. Gresa-Arribas N, Viéitez C, Dentesano G, Serratos J, Saura J, Solà C. Modelling  
472 neuroinflammation in vitro: a tool to test the potential neuroprotective effect of anti-  
473 inflammatory agents. *PLoS One.* 2012;7(9).
- 474 22. Gibbons HM, Dragunow M. Microglia induce neural cell death via a proximity-dependent  
475 mechanism involving nitric oxide. *Brain Res.* 2006;1084(1):1-15.
- 476 23. Sun J, Nan G. The extracellular signal-regulated kinase 1/2 pathway in neurological diseases:  
477 A potential therapeutic target. *Int J Mol Med.* 2017; 39(6): 1338–1346.
- 478 24. Bunney TD, Opaleye O, Roe SM, Vatter P, Baxendale RW, Walliser C, Everett KL, Josephs  
479 MB, Christow C, Rodrigues-Lima F, Gierschik P, Pearl LH, Katan M. Structural insights into  
480 formation of an active signaling complex between Rac and phospholipase C gamma 2. *Mol*  
481 *Cell.* 2009;34:223-33.
- 482 25. Nakamura Y, Fukami K. Regulation and physiological functions of mammalian phospholipase  
483 C. *J. Biochem.* 2017;161:315–21.
- 484 26. Imai Y, Kohsaka S. Intracellular signaling in M $\beta$ CSF $\beta$  induced microglia activation: Role of  
485 Iba1. *Glia.* 2002;40:164-74.
- 486 27. Walliser C, Tron K, Clauß K, Gutman O, Kobitski AY, Retlich M, Schade A, Röcker C,  
487 Henis YI, Nienhaus GU, Gierschik P. Rac-mediated stimulation of phospholipase C- $\gamma$ 2  
488 amplifies B cell receptor-induced calcium signaling. *J Biol Chem.* 2015;290:17056-72.
- 489 28. Socodato R, Portugal CC, Canedo T, Henriques JF, Vaz SH, Magalhães J, Silva CM, Baptista  
490 FI, Alves RL, Nogueira J, Coelho-Santos V, Silva AP, Paes-de-Carvalho R, Magalhães A,  
491 Summavielle T, Brakebusch C, Sebastião AM, Ambrósio AF, Relvas JB. Genetic ablation of

- 492 RhoA in adult microglia causes synapse and neuronal loss. *BioRxiv* [12 Nov 2017], DOI:  
493 10.1101/218107.
- 494 29. Stankiewicz TR, Linseman DA. Rho family GTPases: key players in neuronal development,  
495 neuronal survival, and neurodegeneration. *Front Cell Neurosci.* 2014; 8: 314. doi:  
496 10.3389/fncel.2014.00314
- 497 30. Krasemann S, Madore C, Cialic R, Baufeld C, Calcagno N, El Fatimy R, Beckers L,  
498 O'Loughlin E, Xu Y, Fanek Z, Greco DJ, Smith ST, Tweet G, Humulock Z, Zrzavy T, Conde-  
499 Sanroman P, Gacias M, Weng Z, Chen H, Tjon E, Mazaheri F, Hartmann K, Madi A, Ulrich  
500 JD, Glatzel M, Worthmann A, Heeren J, Budnik B, Lemere C, Ikezu T, Heppner FL, Litvak  
501 V, Holtzman DM, Lassmann H, Weiner HL, Ochando J, Haass C, Butovsky O. The TREM2-  
502 APOE Pathway Drives the Transcriptional Phenotype of Dysfunctional Microglia in  
503 Neurodegenerative Diseases. *Immunity.* 2017;47:566-581.
- 504 31. Keren-Shaul H, Spinrad A, Weiner A, Matcovitch-Natan O, Dvir-Szternfeld R, Ulland TK,  
505 David E, Baruch K, Lara-Astaiso D, Toth B, Itzkovitz S, Colonna M, Schwartz M, Amit I. A  
506 Unique Microglia Type Associated with Restricting Development of Alzheimer's Disease.  
507 *Cell.* 2017;169:1276-1290.
- 508 32. Kang SS, Ebbert MTW, Baker KE, Cook C, Wang X, Sens JP, Kocher JP, Petrucelli L, Fryer  
509 JD. Microglial translational profiling reveals a convergent APOE pathway from aging,  
510 amyloid, and tau. *J Exp Med.* 2018;215(9):2235-2245.
- 511 33. Vignal N, Cisternino S, Rizzo-Padoin N, San C, Hontonnou F, Gelé T, Declèves X, Sarda-  
512 Mantel L, Hosten B. [18F]FEPPA a TSPO Radioligand: Optimized Radiosynthesis and  
513 Evaluation as a PET Radiotracer for Brain Inflammation in a Peripheral LPS-Injected Mouse  
514 Model. *Molecules.* 2018;23(6): pii: E1375. doi: 10.3390/molecules23061375.
- 515 34. Sokoloff L, Reivich M, Kennedy C, Des Rosiers MH, Patlak CS, Pettigrew KD, Sakurada O,  
516 Shinohara M (1977) The [14C]deoxyglucose method for the measurement of local cerebral  
517 glucose utilization: theory, procedure, and normal values in the conscious and anesthetized  
518 albino rat. *J Neurochem* 28: 897–916

- 519 35. Parhizkar S, Arzberger T, Brendel M, Kleinberger G, Deussing M, Focke C, Nuscher B,  
520 Xiong M, Ghasemigharagoz A, Katzmarski N, Krasemann S, Lichtenthaler SF, Müller SA,  
521 Colombo A, Monasor LS, Tahirovic S, Herms J, Willem M, Pettkus N, Butovsky O,  
522 Bartenstein P, Edbauer D, Rominger A, Ertürk A, Grathwohl SA, Neher JJ, Holtzman DM,  
523 Meyer-Luehmann M, Haass C. Loss of TREM2 function increases amyloid seeding but  
524 reduces plaque-associated ApoE. *Nat Neurosci.* 2019;22(2):191-204.
- 525 36. Götzl JK, Brendel M, Werner G, Parhizkar S, Sebastian Monasor L, Kleinberger G, Colombo  
526 AV, Deussing M, Wagner M, Winkelmann J, Diehl-Schmid J, Levin J, Fellerer K,  
527 Reifschneider A, Bultmann S, Bartenstein P, Rominger A, Tahirovic S, Smith ST, Madore C,  
528 Butovsky O, Capell A, Haass C. Opposite microglial activation stages upon loss of PGRN or  
529 TREM2 result in reduced cerebral glucose metabolism. *EMBO Mol Med.* 2019;11(6). pii:  
530 e9711. doi: 10.15252/emmm.201809711.
- 531 37. Martiskainen H, Paldanius KMA, Natunen T, Takalo M, Marttinen M, Leskelä S, Huber N,  
532 Mäkinen P, Bertling E, Dhungana H, Huuskonen M, Honkakoski P, Hotulainen P, Rilla K,  
533 Koistinaho J, Soininen H, Malm T, Haapasalo A, Hiltunen M. DHCR24 exerts  
534 neuroprotection upon inflammation-induced neuronal death. *J Neuroinflammation.*  
535 2017;14(1):215.

## 536 **Figure Legends**

537 **Figure 1. The *Plcγ2*-P522R variant increases *Plcγ2* enzymatic activity, survival, phagocytic**  
538 **activity, and inflammatory response in macrophages.** A) A schematic view of *Plcγ2* signaling. B)  
539 Strategy to target murine *Plcγ2* locus, indicating protospacer region (blue), protospacer adjacent  
540 region (PAM, purple), and introduced nucleotide changes (missense: green; silent: orange). C)  
541 Inositol monophosphate (Ip1) formation in *Plcγ2*-P522R knock-in (KI) and wild type (WT) bone  
542 marrow-derived macrophages (BMDMs) in basal state and after 1h m-3M3FBS (phospholipase C  
543 agonist, 25μM) stimulation. Values are normalized to the total protein concentration. Mean ± SD, %  
544 of untreated (UNT) WT, n=4 per genotype, 2 technical replicates. Two-way ANOVA, LSD post hoc  
545 test, \*\*\*p<0.001 (genotype effect), ##p<0.001 (treatment effect). D) Lactate dehydrogenase (LDH)

546 levels in KI and WT BMDMs after 4h, 24h and 48h macrophage colony stimulation factor 1 (mCSF)  
547 withdrawal. Values are normalized to the maximum LDH release within each well. Mean  $\pm$  SD, % of  
548 WT (4h), n=3-4 per genotype, 2 technical replicates. Two-way ANOVA, LSD post hoc test, \* $p$ <0.05,  
549 \*\* $p$ <0.01. E) Phagocytic activity in KI and WT BMDMs. Cytochalasin D (CytD, 5 $\mu$ M) was used as a  
550 control. pHrodo signal is normalized to the cell count in each well. Mean  $\pm$  SEM, n=6-7 per genotype,  
551 3 technical replicates. Independent samples *t*-test, n.s. non-significant. F) Phagocytic activity in BV2  
552 microglial cells overexpressing Myc-tagged human PLC $\gamma$ 2-P522R, PLC $\gamma$ 2-WT, or control (CTRL)  
553 vector shown as median fluorescence intensity (MFI, left panel) and percentage of phagocytic cells  
554 (right panel). Western blot (lower panel) confirming overexpression of P522R and WT constructs.  
555 Mean  $\pm$  SD, % of CTRL, n=4. Mann-Whitney U test, \* $p$ <0.05, \*\*\* $p$ <0.001. G) Interleukin-6 (IL-6),  
556 tumor necrosis factor  $\alpha$  (TNF $\alpha$ ), IL-1 $\beta$ , and nitric oxide (NO) levels in conditioned media of KI and  
557 WT BMDMs upon 3h lipopolysaccharide (LPS) and interferon gamma (IFN $\gamma$ )-treatment. Values are  
558 normalized to the total protein concentration in the corresponding wells. Mean  $\pm$  SD, % of WT, n=3-4  
559 per genotype. Independent samples *t*-test, \* $p$ <0.05, \*\* $p$ <0.01.

560 **Figure 2. Activated microglia and astroglia in brains of mice expressing the *Plcg2-P522R***  
561 **protective mutation.** A) A heatmap showing significantly ( $p$ <0.05) changed gene expression and  
562 associated themes obtained from the neuropathology panel. Targets are arranged according to log<sub>2</sub>-  
563 transformed fold-changes in *Plcg2*-P522R homozygote knock-in (KI) mice as compared to the wild  
564 type (WT) littermates, n=3 per genotype. B) A String-network graphic and kmeans clustering of  
565 significantly affected targets associated with *Plcg2* ([https://string-](https://string-db.org/cgi/network.pl?taskId=AF3kTOpi6ovG)  
566 [db.org/cgi/network.pl?taskId=AF3kTOpi6ovG](https://string-db.org/cgi/network.pl?taskId=AF3kTOpi6ovG)). C) A heatmap showing pathway scores for  
567 neuropathology panel-derived pathway annotations. Significantly changed pathways are indicated  
568 with asterisk, n=3 per genotype, Independent samples *t*-test, \* $p$ <0.05, \*\* $p$ <0.01, \*\*\* $p$ <0.001. D)  
569 Representative images of Gfap-stained hippocampus from WT and KI mice (upper panel).  
570 Significantly higher levels of Gfap were detected in the hippocampus, but not in the cortex of KI mice  
571 (lower panel). Scale bars represent 10 $\mu$ m. Mean  $\pm$  SD, n=4 per genotype, two-tailed unpaired *t*-test,  
572 \* $p$ <0.05.

573 **Figure 3. Plcγ2-P522R expression increases microglia activation in the brain of one-year-old**  
574 **mice.** A) Representative PET-images of the uptake of 18F-FEPPA (time window 15-70min) (upper  
575 panel) in the brains of Plcγ2-P522R homozygous knock-in (KI) and wild type (WT) female mice at  
576 one year of age. Estimated total distribution volume (DV, ml/ml) in total brain, frontal cortex, pons,  
577 hippocampus, and cerebellum calculated with the Logan model using image derived input function  
578 (IDIF, lower panel), n=3-4 per genotype. Independent samples *t*-test, \**p*<0.05. B) Representative PET  
579 images of the uptake of 18F-FDG (time window 20-80min) in WT and KI mouse (upper panel).  
580 Cerebral metabolic rate of glucose [MRGlu, (ml/min\*ml)] was estimated using the Patlak model (with  
581 lumped constant of 0.71, lower panel), n=3-4 per genotype. Independent samples *t*-test.

582

# Figure 1

bioRxiv preprint doi: <https://doi.org/10.1101/2020.04.08.031567>; this version posted April 9, 2020. The copyright holder for this preprint (which was not certified by peer review) is the author/funder. All rights reserved. No reuse allowed without permission.

**A.**

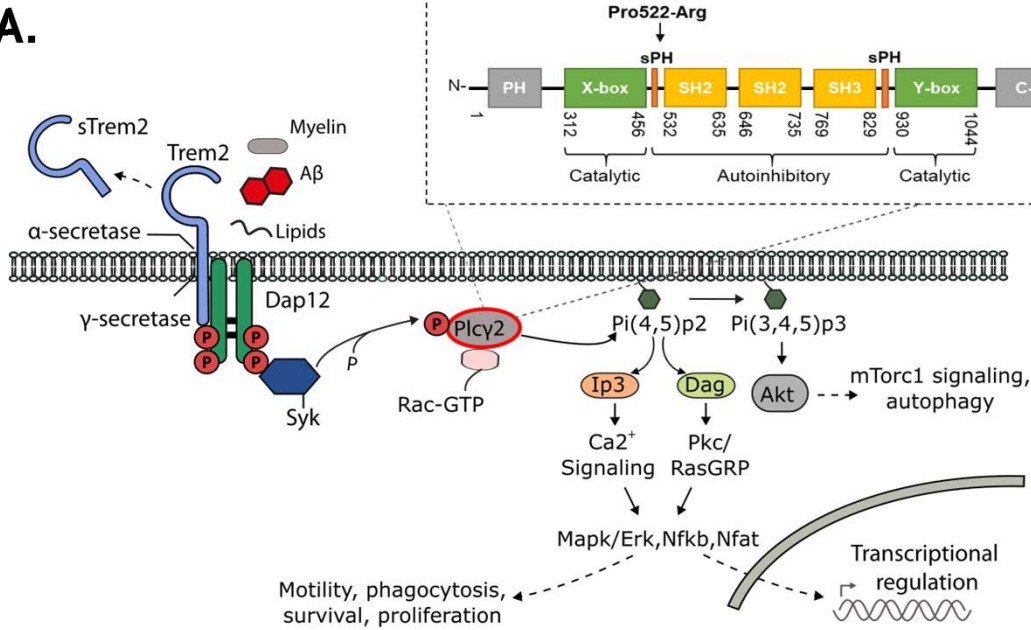

**B.**

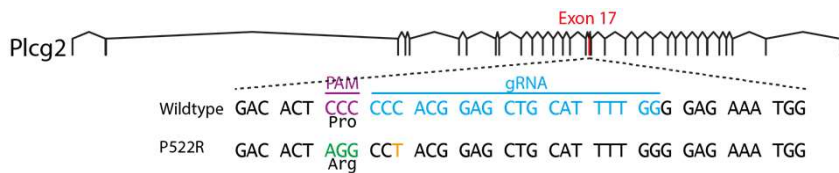

**C.**

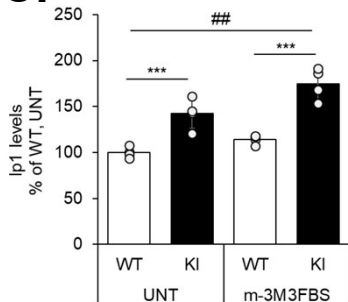

**D.**

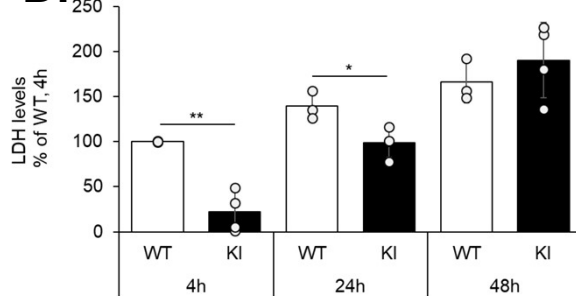

**E.**

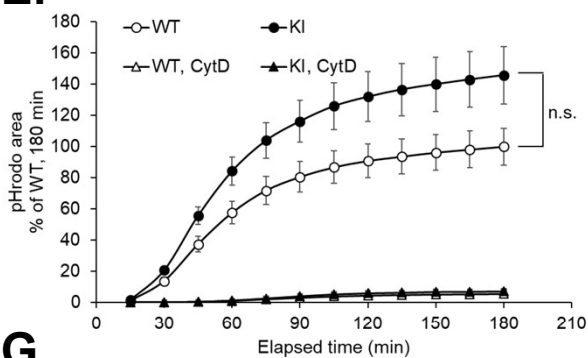

**F.**

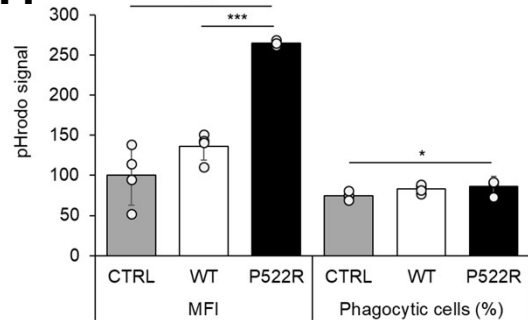

**G.**

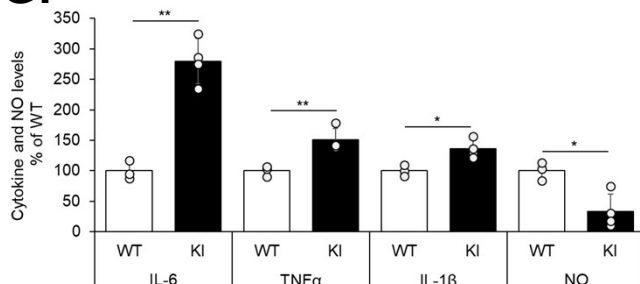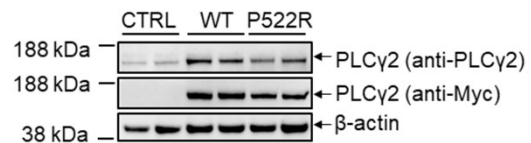



# Figure 2

bioRxiv preprint doi: <https://doi.org/10.1101/2020.04.08.031567>; this version posted April 9, 2020. The copyright holder for this preprint (which was not certified by peer review) is the author/funder. All rights reserved. No reuse allowed without permission.

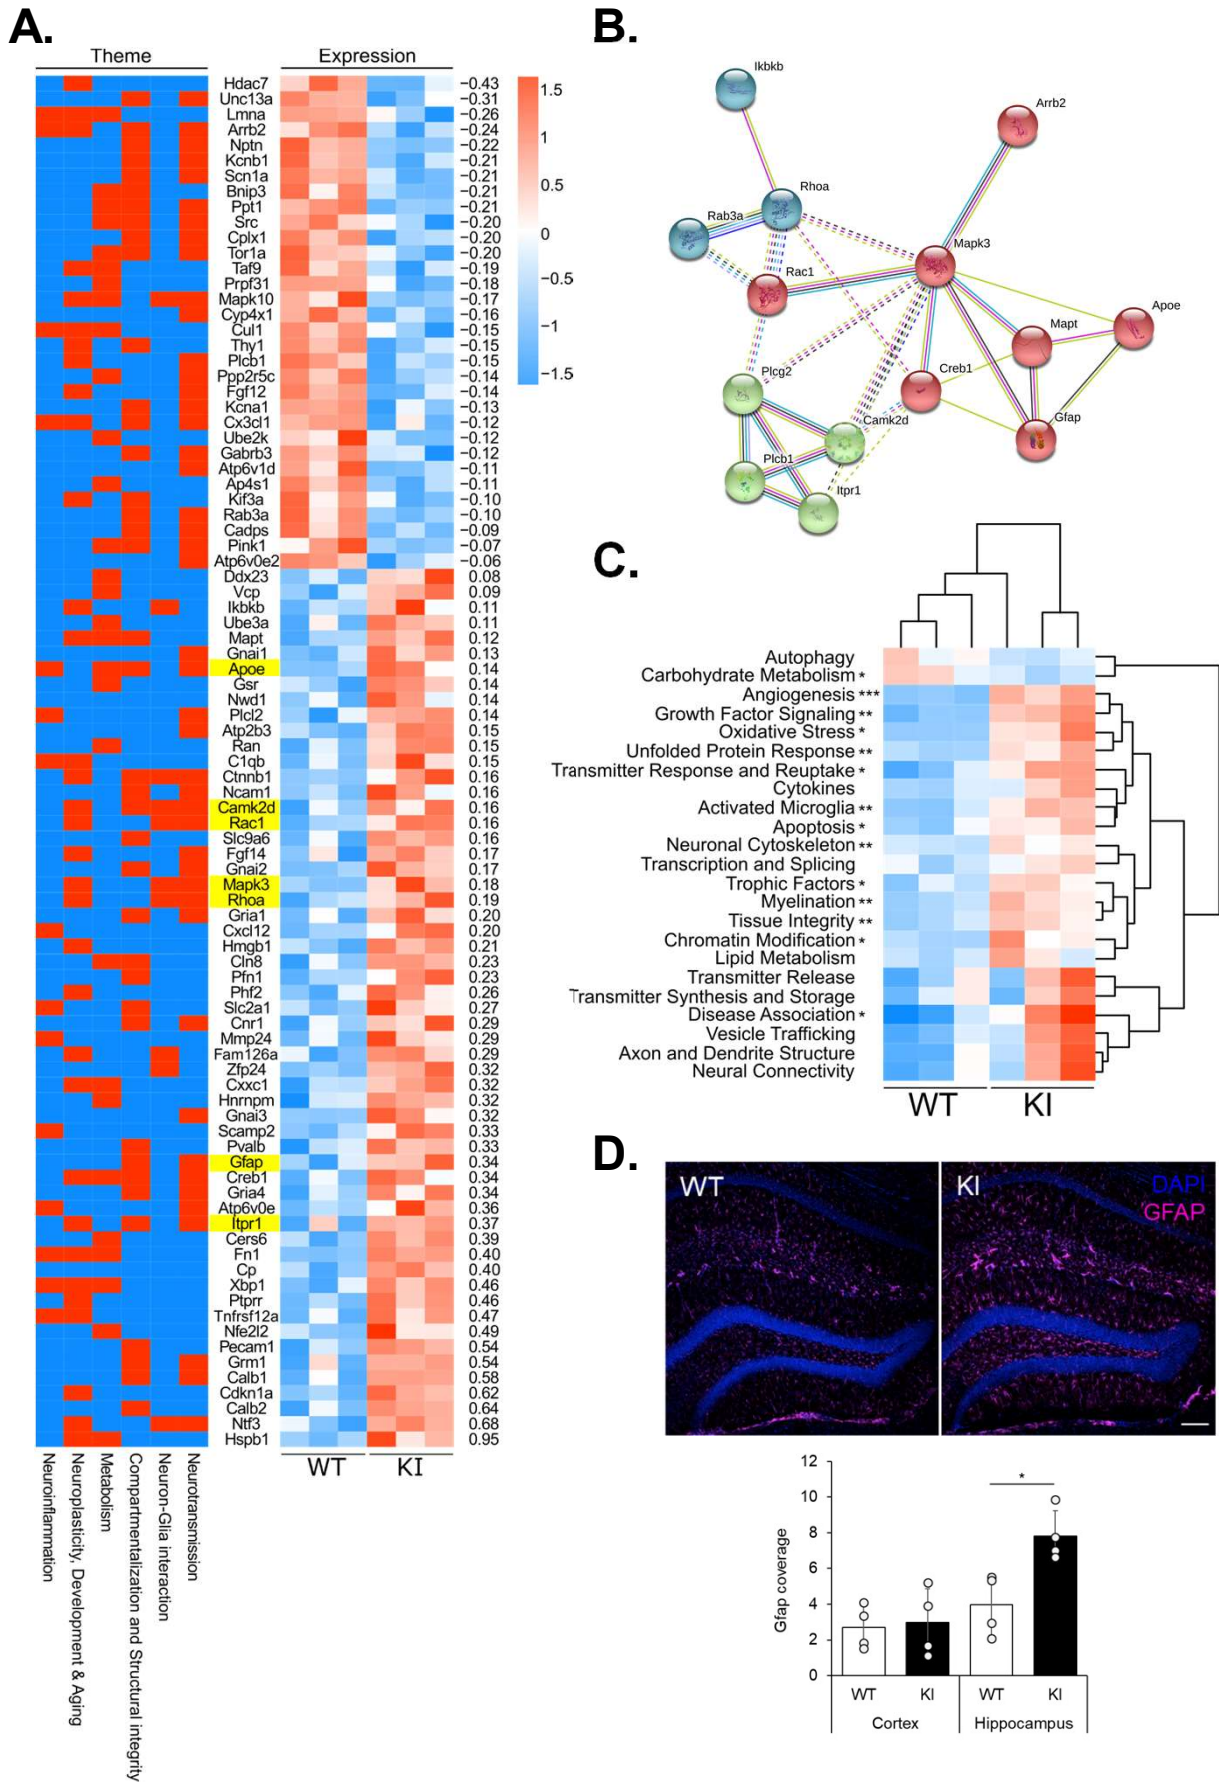

# Figure 3

bioRxiv preprint doi: <https://doi.org/10.1101/2020.04.08.031567>; this version posted April 9, 2020. The copyright holder for this preprint (which was not certified by peer review) is the author/funder. All rights reserved. No reuse allowed without permission.

**A.**

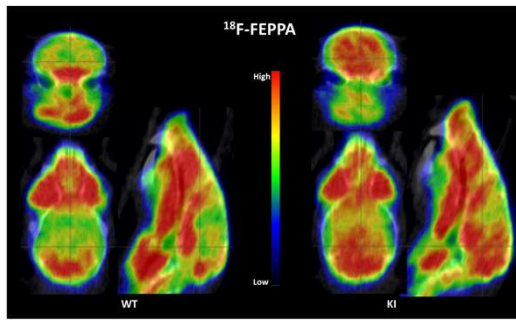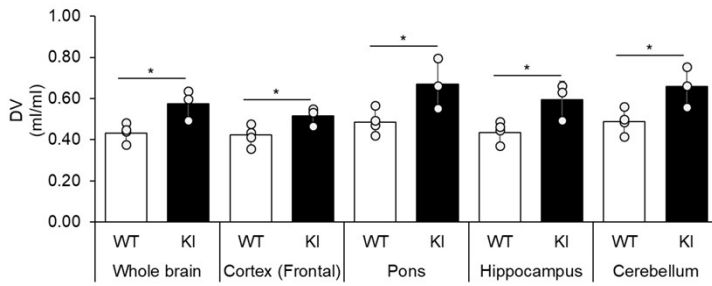

**B.**

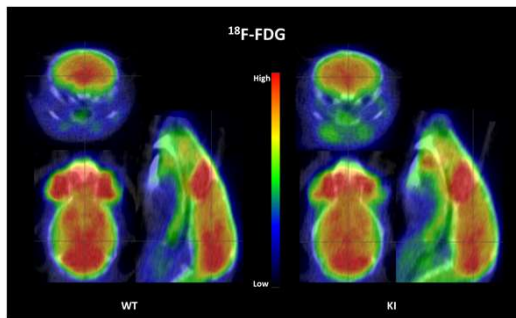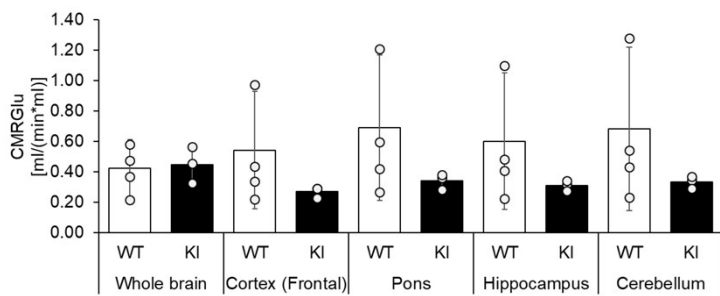

Source: https://www.biorxiv.org/content/10.1101/2020.04.08.031567v1.full.pdf
