# Supplementary material for: The Alzheimer’s disease-associated protective Plcγ2-P522R variant promotes beneficial microglial functions
Source: bioRxiv or medRxiv preprint supplement (doi:10.1101/2020.04.08.031567), 2020-04-09
Supplement: Supplementary file [file media-1.pdf]

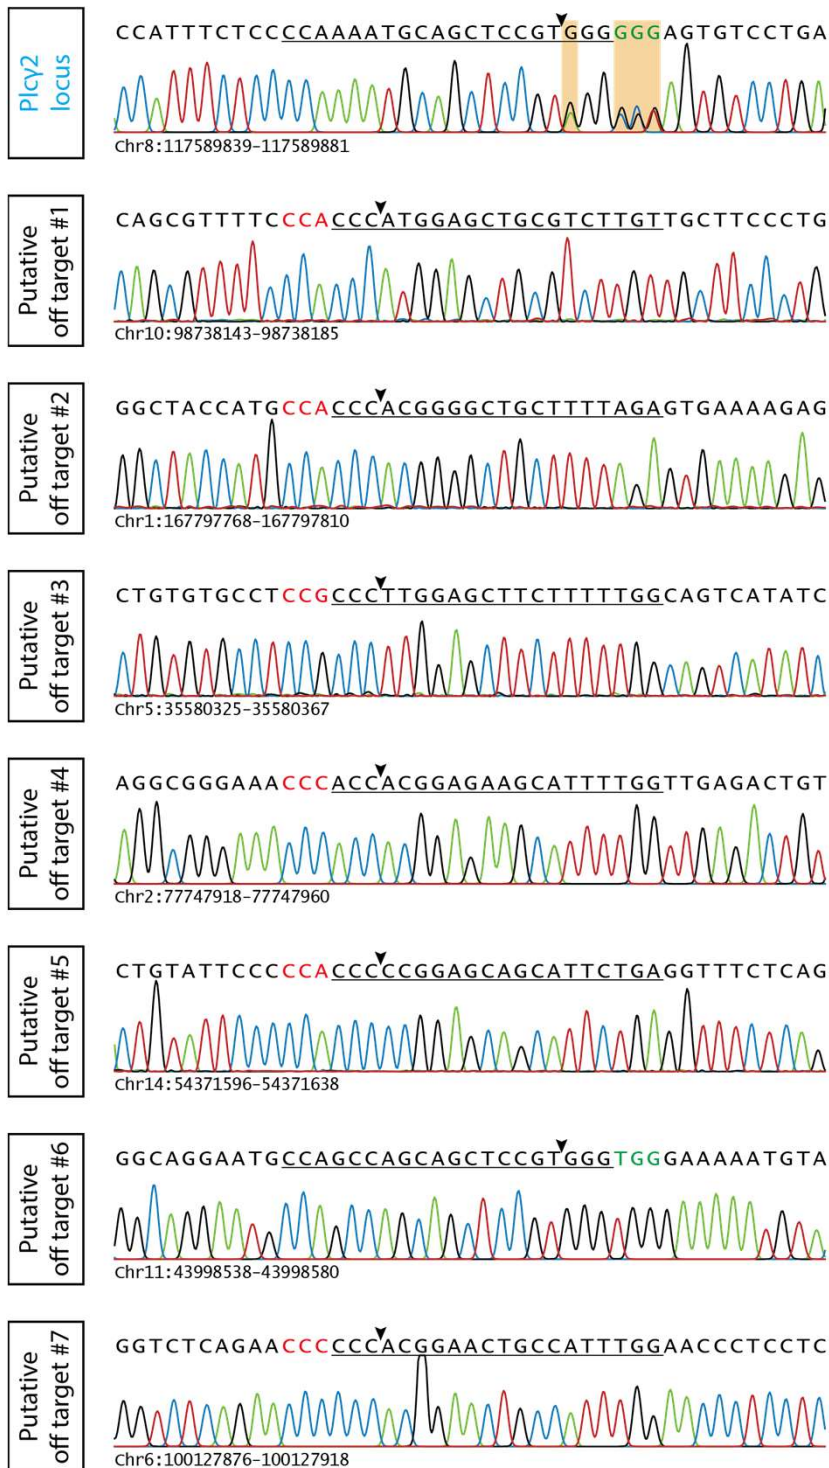

**Supplementary figure 1:** Representative Sanger-sequencing chromatograms of the *Plcy2* on-target site and the seven putative off target sites of a heterozygous F1 animal. Mixed peaks in the *Plcy2* locus show the correct P522R substitution (CCC>AGG, on complementary strand) and a silent mutation for genotyping purposes. Underlined: Protospacer; arrow head: putative cut site; green letters: PAM site on shown strand; red letters: PAM site on complementary strand.

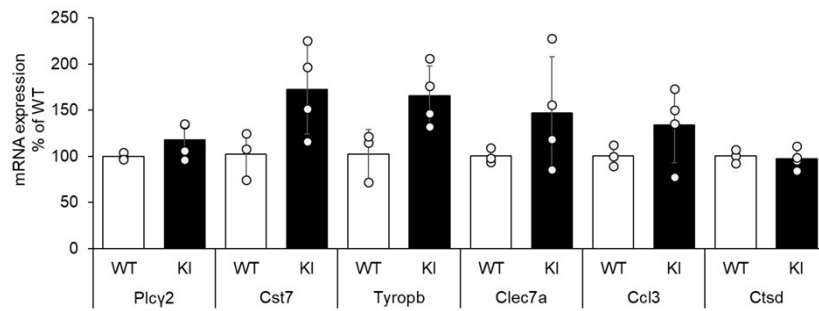

**Supplementary figure 2:** RNA expression levels of Plcy2 and microglia specific disease-associated microglia signature genes, Cst7, Tyrobp, Clec7a, Ccl3, and Cttd in the brain of six-month-old Plcy2-P522R homozygous knock-in (KI) and wild type (WT) mice. Normalized to the WT group, mean  $\pm$  SD, n=3-4 per genotype.
